# Supplementary material for: Prognosis of recurrent bacterial vaginosis based on longitudinal changes in abundance of Lactobacillus and specific species of Gardnerella
Source: PubMed Central journal article supplement (PMC8382169; doi:10.1371/journal.pone.0256445), 2021-08-23

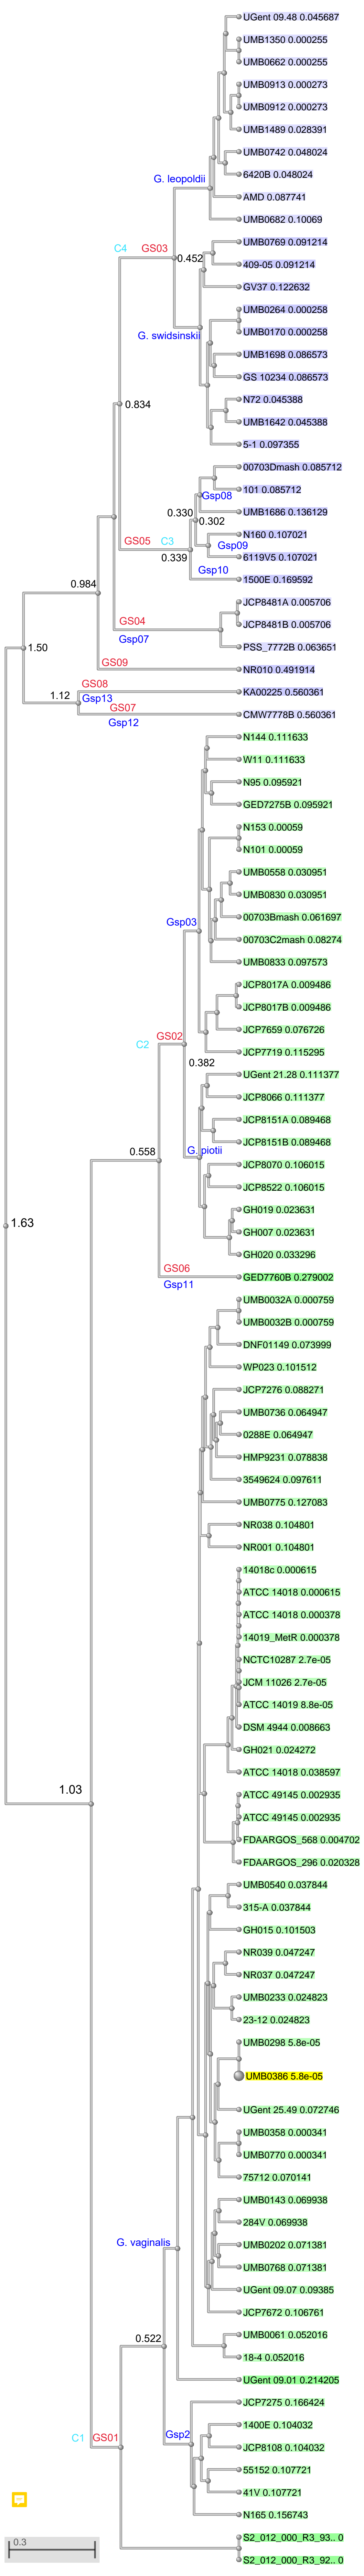

Supplement: pone.0256445.s001.pdf [file pone.0256445.s001.pdf]
